# Supplementary material
Source: Springer Nature journal article supplement (https://www.springermedizin.de/resource/supplementary/13024_2013_521_MOESM16_ESM.pdf/9644394)
Supplement: MOESM16 [file 9644394]

**A**

Paraffin horizontal section

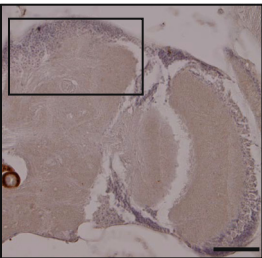**B***elav-GAL4* $A\beta$ 42 x2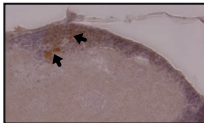

ABri x2

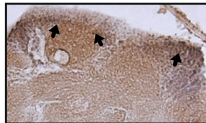

ADan x2

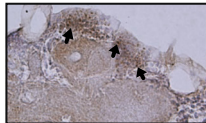

BRI2-23 x2

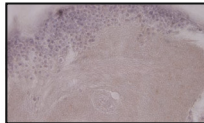

BRI2-23 x2

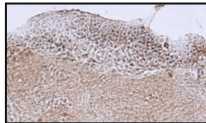

BRI2-23 x2

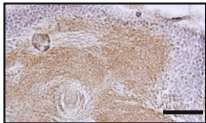anti- $A\beta$ 

anti-ABri

anti-ADan
